# Supplementary material for: KL2 mentored career development programs at clinical and translational science award hubs: Practices and outcomes
Source: PubMed Central journal article supplement (PMC7103475; doi:10.1017/cts.2019.424), 2019-12-26
Supplement: S2059866119004242sup001.pdf [file S2059866119004242sup001.pdf]

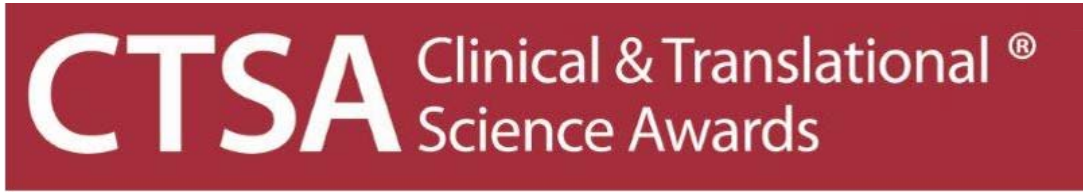

Career Sustainability Survey Of KL2 Programs

Please complete the survey below. We estimate this survey will take xx minutes to complete.

Thank you!

INSTITUTIONAL FACTORS: Please indicate the extent to which the following schools/colleges/other CTSA partners currently participate in your CTSA Workforce Development KL2? ( we realize that these participating units may have changed over time; please check all that apply now)

|                                                                                          | Individuals from this unit are <u>eligible to apply for a KL2 program</u> | Individuals from this unit <u>have applied for a KL2 award</u> | Individuals from this unit <u>have received a KL2 award</u> | N/A                      |
|------------------------------------------------------------------------------------------|---------------------------------------------------------------------------|----------------------------------------------------------------|-------------------------------------------------------------|--------------------------|
| School of Medicine                                                                       | <input type="checkbox"/>                                                  | <input type="checkbox"/>                                       | <input type="checkbox"/>                                    | <input type="checkbox"/> |
| School of Dentistry                                                                      | <input type="checkbox"/>                                                  | <input type="checkbox"/>                                       | <input type="checkbox"/>                                    | <input type="checkbox"/> |
| School of Engineering                                                                    | <input type="checkbox"/>                                                  | <input type="checkbox"/>                                       | <input type="checkbox"/>                                    | <input type="checkbox"/> |
| School of Nursing                                                                        | <input type="checkbox"/>                                                  | <input type="checkbox"/>                                       | <input type="checkbox"/>                                    | <input type="checkbox"/> |
| School of Pharmacy                                                                       | <input type="checkbox"/>                                                  | <input type="checkbox"/>                                       | <input type="checkbox"/>                                    | <input type="checkbox"/> |
| School of Veterinary Medicine                                                            | <input type="checkbox"/>                                                  | <input type="checkbox"/>                                       | <input type="checkbox"/>                                    | <input type="checkbox"/> |
| School of Public Health                                                                  | <input type="checkbox"/>                                                  | <input type="checkbox"/>                                       | <input type="checkbox"/>                                    | <input type="checkbox"/> |
| Non-Health Sciences College (ex. Science (biology/chemistry), Education, Social Science) | <input type="checkbox"/>                                                  | <input type="checkbox"/>                                       | <input type="checkbox"/>                                    | <input type="checkbox"/> |
| Department of Health                                                                     | <input type="checkbox"/>                                                  | <input type="checkbox"/>                                       | <input type="checkbox"/>                                    | <input type="checkbox"/> |
| Non-University Research Institute                                                        | <input type="checkbox"/>                                                  | <input type="checkbox"/>                                       | <input type="checkbox"/>                                    | <input type="checkbox"/> |
| Health Care Organization                                                                 | <input type="checkbox"/>                                                  | <input type="checkbox"/>                                       | <input type="checkbox"/>                                    | <input type="checkbox"/> |
| Other Partner Organizations                                                              | <input type="checkbox"/>                                                  | <input type="checkbox"/>                                       | <input type="checkbox"/>                                    | <input type="checkbox"/> |

If other please specify

APPLICATION AND SELECTION FACTORS

Does your application generally mimic the NIH K format and selection criteria (i.e., potential of the applicant to become a successful clinical/translational investigator; quality of hypothesis driven research proposal; feasibility in a two year time frame; mentor(s) and track records, training plan; research plan)?

- Yes
- No

Please indicate how important the following additional criteria are in your current review process when making individual KL2 awards.

|                                                           | Essential/Required       | Very Important           | Somewhat Important       | Not Important            |
|-----------------------------------------------------------|--------------------------|--------------------------|--------------------------|--------------------------|
| Interdisciplinary focus of proposed research and training | <input type="checkbox"/> | <input type="checkbox"/> | <input type="checkbox"/> | <input type="checkbox"/> |

|                                                                                                               |                          |                          |                          |                          |
|---------------------------------------------------------------------------------------------------------------|--------------------------|--------------------------|--------------------------|--------------------------|
| Team science focus of proposed research                                                                       | <input type="checkbox"/> | <input type="checkbox"/> | <input type="checkbox"/> | <input type="checkbox"/> |
| Community impact of proposed research                                                                         | <input type="checkbox"/> | <input type="checkbox"/> | <input type="checkbox"/> | <input type="checkbox"/> |
| Health disparities/equity impact of proposed research                                                         | <input type="checkbox"/> | <input type="checkbox"/> | <input type="checkbox"/> | <input type="checkbox"/> |
| Applicant's membership in a group under-represented in the biomedical workforce (race, ethnicity, disability) | <input type="checkbox"/> | <input type="checkbox"/> | <input type="checkbox"/> | <input type="checkbox"/> |

Please indicate how important the following criteria are in your current review process when putting together the KL2 cohort

|                                                                                                            | Essential/Required       | Very Important           | Somewhat Important       | Not Important            |
|------------------------------------------------------------------------------------------------------------|--------------------------|--------------------------|--------------------------|--------------------------|
| Maximizing the diversity of the cohort with respect to research translational stage                        | <input type="checkbox"/> | <input type="checkbox"/> | <input type="checkbox"/> | <input type="checkbox"/> |
| Maximizing the diversity of the cohort with respect to demographic factors (eg. gender, race, ethnicity)   | <input type="checkbox"/> | <input type="checkbox"/> | <input type="checkbox"/> | <input type="checkbox"/> |
| Maximizing the diversity of the cohort with respect to discipline                                          | <input type="checkbox"/> | <input type="checkbox"/> | <input type="checkbox"/> | <input type="checkbox"/> |
| Please list any other additional criteria you use in your selection of KL2 scholars and/or the KL2 cohort. |                          |                          |                          |                          |

Please indicate how important the following factors are in the makeup of your current CTSA KL2 selection committee.

|                                                                                                     | Critical/Required                                     | Very Important           | Somewhat Important       | Not Important            |
|-----------------------------------------------------------------------------------------------------|-------------------------------------------------------|--------------------------|--------------------------|--------------------------|
| Committee has good representation from your major CTSA partners and departments                     | <input type="checkbox"/>                              | <input type="checkbox"/> | <input type="checkbox"/> | <input type="checkbox"/> |
| Committee reflects research foci across the translational spectrum                                  | <input type="checkbox"/>                              | <input type="checkbox"/> | <input type="checkbox"/> | <input type="checkbox"/> |
| Diversity of the committee (i.e. gender, race, ethnicity)                                           | <input type="checkbox"/>                              | <input type="checkbox"/> | <input type="checkbox"/> | <input type="checkbox"/> |
| Do you use specific subject matter expert reviewers who are not members of the selection committee? | <input type="radio"/> Yes<br><input type="radio"/> No |                          |                          |                          |
| Roughly what percent of your usual applicant pool do you fund? (ie. payline)                        |                                                       |                          |                          |                          |

Other Eligibility Criteria

|                                                                                                                           |                                                                                                                                                                                                              |
|---------------------------------------------------------------------------------------------------------------------------|--------------------------------------------------------------------------------------------------------------------------------------------------------------------------------------------------------------|
| Applicants with the following faculty ranks ( or equivalent) are eligible for a KL2 award ( <u>Check all that apply</u> ) | <input type="checkbox"/> Instructor<br><input type="checkbox"/> Assistant Professor<br><input type="checkbox"/> Associate Professor<br><input type="checkbox"/> Other applicant eligibility (please specify) |
| Applicants on the following tracks are eligible for a KL2                                                                 | <input type="checkbox"/> Tenure-seeking                                                                                                                                                                      |

award ( Check all that apply)

- Research
- Clinical
- Other applicant eligibility ( please specify)

CTSA and KL2 Program Factors

What is the current funding level size and allowed number of KL2 slots of your CTSA program?

- Small
- Medium
- Large

Small CTSA funding level size = less than or equal to 4, Medium CTSA funding level size=6, Large CTSA funding level size=9

Is your KL2 program currently operating under these CTSA funding level sizes?

- Yes
- No

What is the largest number of total CTSA-funded or authorized slots that your KL2 program has had at any one time?

Did you use institutional co-funding or cost sharing in order to fill that maximal number of slots?

- Yes
- No

What is the cumulative number of CTSA funded KL2-scholars appointed over the lifetime of your KL2 program?

Of the following scenarios, please check all that describe your K directorship.

- Little turnover of the senior directors over the life of the program
- Extensive turnover over the life of the program
- One primary director who currently mentors co-directors for sustainability
- Current co-directors with complementary skills and responsibilities to those of the main/contact KL2 PI

Current KL2 Program PI/Director (main/contact PI) Degree (check all that apply)

- MD
- PhD
- Other

Does the current KL2 Program PI/Director (main/contact PI) have an education related degree?

- Yes
- No

What other relevant training does your KL2 Program PI/Director (main/contact PI) have?

Has the current KL2 Program PI/ Director (main/contact PI) ever been K24-supported?

- Yes
- No

What is the maximum number of years of CTSA/KL2 grant support that KL2 scholars can receive in your current program?

In the past, what was the typical duration of support for your KL2 graduates? (number in years)

In the past, what was the maximal duration of support for your KL2 graduates? (number in years)

What options do you currently have, using institutional funds, to extend scholars' support (at funding levels equivalent to the KL2) for a longer duration than provided by CTSA/ KL2 grant funds?

- Institutional support prior to KL2 appointment
- Institutional support after KL2 appointment
- No institutional scholar support before or after duration of KL2

Do you have any other parallel internal or extramurally funded KL2 equivalent career development programs?

- Yes
- No

Which training opportunities (regardless of sponsorship) are offered currently to your KL2 scholars? (check all that apply):

- Research in Progress
- Grant writing
- Leadership training
- Mentorship training
- Scientific writing
- Team Science
- Entrepreneurship
- Off-Site experiences (eg. externships, mini-sabbaticals)
- Other

Can scholars with individual K awards (or equivalent), access KL2 programming (as described above)?

- Yes
- No

How, if at all, do KL2 graduates commonly contribute to your CTSA? (check all that apply)

- Acting as mentors
- Facilitating K writing groups
- Review pilot award applications
- Other (please specify)

Are faculty compensated in any way to mentor KL2 scholars?

- Yes
- No

What is the minimum size of the KL2 mentor team?

What is the typical frequency that the scholar meets with any member of the mentoring team?

What is the typical frequency the scholar meets with the

entire mentoring team?

What is the typical frequency the scholar, along with any mentors, meets with KL2 leadership?

Is a mentor training program currently required for the mentors of KL2 scholars?

- Yes  
 No

Is a formal Individual Development Plan (IDP) currently required for each KL2 scholar?

- Yes  
 No

Do you recommend a specific IDP template?

- Yes  
 No

### Scholar Factors (appointed to date upon enrollment in KL2 program)

I was unable to collect the data on this table (check all that apply)

- Unable to collect data, does not exist

Of all your scholars to date, approximately what percent had the following Doctoral degrees upon enrollment in the KL2 Program? (percentages should total 100%)

Attachment:  [Scholars who enrolled in KL2 programs with the following degrees 01\\_17\\_2017.docx](#) (0.01 MB)

Please complete and upload the table describing the Doctoral degrees held by all of your CTSA KL2 scholars appointed to date here.

 [Upload document](#)

### Primary employment and rank at the time of KL2 appointment

Approximately what percent of KL2 scholars appointed to date entered with the following primary employment and rank types.

Attachment:  [Primary Appt Table\\_v01\\_17\\_2017.docx](#) (0.01 MB)

Please complete and upload the table on KL2 primary appointments here.

 [Upload document](#)

### KL2 scholar characteristics

Please complete and upload the table on KL2 applicants and awardees by gender and URM status in the next field.

Attachment:  [KL2 Applicants and Awardees by Gender and URM Status.docx](#) (0.01 MB)

Please complete and upload the table on gender and URM status here

 [Upload document](#)

Of all your KL2 scholars to date, approximately what percent enrolled in the following during their KL2 period of support?

MS program

PhD program

Certificate program

Individual courses

No formal coursework completed

**Of all of your scholars to date, approximately what percent completed a degree or certificate in clinical/translational research ( noted above) prior to KL2 training?**

Either a degree or certificate prior to KL2 enrollment

**Of your KL2 scholars to date, approximately what percentage shortened their KL2 support to less than two years by immediately transitioning to:**

Individual career development award ( eg. K08, K23, foundation)

R01 or equivalent

**Following at least two years of KL2 support, approximately what percentage of KL2 scholars transitioned within one year of KL2 completion to:**

Individual career development award ( eg. K08, K23, foundation)

R01 or equivalent

**Please complete and upload the table describing the KL2 awardees extramural research funding received by your scholars during and immediately after their period of KL2 support in the next field.**

Attachment: [KL2 Awardees Extramural Research Funding During and After Their Period of KL2 Support.docx](#) (0.02 MB)

**Please complete and upload the table on KL2 extramural funding here.**

 [Upload document](#)

**Career Activities after KL2 completion (time period- up to 3 years after completion of both grant and any linked institutional support)**

**Please complete the following table on career activities within the first three years of KL2 program completion and upload the table in the next field**

Attachment: [Career Trajectory table\\_01\\_17\\_2017.docx](#) (0.02 MB)

Please complete and upload the table on KL2 career activities here.

 [Upload document](#)

Please indicate which individuals were involved in gathering the data for this survey (check all that apply):

- KL2 Coordinator
- KL2 Director
- KL2 PI
- CTSA PI
- Evaluator
- Administrative Assistant
- Student Hourly (or other part-time assistant)
- Other (please indicate)

Please estimate the number of person hours needed to gather the data for this survey.

Please feel free to include here any comments about your experience completing this survey (e.g., clarity of particular survey questions, ease of gathering the data, potential value of the aggregate data for your hub, special circumstances we should know about your responses)

Submit

Save & Return Later

## SURVEY DATA TABLES

### CAREER TRAJECTORY TABLE

INSTRUCTIONS: In these tables, please count “KL2 completion” as the time each scholar completed all KL2 related training including that supported by the KL2 and any linked institutional support. Please report data separately for those scholars who are 0-3 years post KL2 completion and those > 3 years post completion. Estimates are acceptable. We do not anticipate that you will attempt to get scholar-by-scholar information specifically beyond that which you have already tracked or obtained.

#### SUMMARY

|                                                     |  |
|-----------------------------------------------------|--|
| Total # of KL2 graduates to date                    |  |
| # of KL2 graduates who completed $\leq 3$ years ago |  |
| # of KL2 graduates who completed > 3 years ago      |  |

#### CURRENT LOCATION/EMPLOYMENT OF YOUR GRADUATES (estimates ok)

| CURRENT LOCATION/EMPLOYMENT                                | Number of KL2s $\leq 3$ years following completion | Number of KL2s > 3 years following completion |
|------------------------------------------------------------|----------------------------------------------------|-----------------------------------------------|
| Currently at your CTSA institution                         |                                                    |                                               |
| Moved to a different academic institution                  |                                                    |                                               |
| Moved to non-academic employment (Government/non-Profit)   |                                                    |                                               |
| Moved to non-academic employment (Private sector/industry) |                                                    |                                               |
| Moved to non-academic employment (Hospital /other)         |                                                    |                                               |
| Other: unknown/ no longer in workforce / lost to follow-up |                                                    |                                               |

#### TRANSLATIONAL RESEARCH EFFORT (estimates ok)

| Effort devoted to Clinical & Translational Research (C&TR) | Number of KL2s $\leq 3$ years following completion | Number of KL2s > 3 years following completion |
|------------------------------------------------------------|----------------------------------------------------|-----------------------------------------------|
| No effort in C&TR                                          |                                                    |                                               |
| < 30% effort in C&TR                                       |                                                    |                                               |
| > 30% effort in C&TR                                       |                                                    |                                               |
| Engaged in C&TR ( % effort unknown)                        |                                                    |                                               |



| KL2 Applicants and Awardees by Gender and URM Status<br>( Life of Program)                                                                                                                                                                                                              |              |            |
|-----------------------------------------------------------------------------------------------------------------------------------------------------------------------------------------------------------------------------------------------------------------------------------------|--------------|------------|
| Gender                                                                                                                                                                                                                                                                                  |              |            |
|                                                                                                                                                                                                                                                                                         | # Applicants | # Accepted |
| Male                                                                                                                                                                                                                                                                                    |              |            |
| Female                                                                                                                                                                                                                                                                                  |              |            |
| URM Status*                                                                                                                                                                                                                                                                             |              |            |
|                                                                                                                                                                                                                                                                                         | # Applicants | # Accepted |
| URM                                                                                                                                                                                                                                                                                     |              |            |
| Non-URM                                                                                                                                                                                                                                                                                 |              |            |
| Unknown                                                                                                                                                                                                                                                                                 |              |            |
| <p>*<b>URM</b>=African-American/Black; Hispanic/Latino; American Indian or Alaskan Native; Native Hawaiian or Other Pacific Islander; Two or more races (if one of those is underrepresented); and Persons with Disabilities as defined by the ADA<br/> <b>Non-URM</b>=White; Asian</p> |              |            |

| KL2 Awardees Extramural Research Funding During and After Their Period of KL2 Support |                                                                                           |         |                                                                                                        |         |                                                                                                      |         |
|---------------------------------------------------------------------------------------|-------------------------------------------------------------------------------------------|---------|--------------------------------------------------------------------------------------------------------|---------|------------------------------------------------------------------------------------------------------|---------|
| Source of Extramural Funding<br>( total should add up to 100%)                        | Approximate % of KL2 scholars to date that were awarded extramural funding during the KL2 |         | Approximate % of KL2 scholars to date that were awarded extramural funding within a year after the KL2 |         | Approximate % of KL2 scholars to date that were awarded extramural funding within 5 years of the KL2 |         |
|                                                                                       | As PI                                                                                     | As Co-I | As PI                                                                                                  | As Co-I | As PI                                                                                                | As Co-I |
| NIH award                                                                             |                                                                                           |         |                                                                                                        |         |                                                                                                      |         |
| Other Federal Award (Ex. VA, AHRQ, CDC, NSF)                                          |                                                                                           |         |                                                                                                        |         |                                                                                                      |         |
| Foundation/Professional society grant (Ex. AHA, ACS, RWJ, Doris Duke)                 |                                                                                           |         |                                                                                                        |         |                                                                                                      |         |
| Commercial Sponsored Research                                                         |                                                                                           |         |                                                                                                        |         |                                                                                                      |         |
| No extramural funding                                                                 |                                                                                           |         |                                                                                                        |         |                                                                                                      |         |
| No information available                                                              | ----                                                                                      | ----    |                                                                                                        |         |                                                                                                      |         |
| Specific Funding Mechanisms                                                           | As PI                                                                                     | As Co-I | As PI                                                                                                  | As Co-I | As PI                                                                                                | As Co-I |
| Major Research Project Grants (Ex. R01, PPG, VA Merit or equivalent)                  |                                                                                           |         |                                                                                                        |         |                                                                                                      |         |
| Other Research Project Grants ( Ex. R03, R21 or equivalent)                           |                                                                                           |         |                                                                                                        |         |                                                                                                      |         |
| Individual career development awards, federal or foundation                           |                                                                                           |         |                                                                                                        |         |                                                                                                      |         |
| Cooperative Agreements and Contracts                                                  |                                                                                           |         |                                                                                                        |         |                                                                                                      |         |

**PRIMARY APPOINTMENT TABLE**

| <b>Estimated Percent of total KL2 Scholars with the following Primary Appointments at the start of the KL2 program<br/>( chose only one appointment ) ( % )</b> |   |
|-----------------------------------------------------------------------------------------------------------------------------------------------------------------|---|
| Scientist \ Researcher                                                                                                                                          | % |
| Academic \ faculty title (Assistant Professor and beyond, any track or type)                                                                                    | % |
| Lecturer \ Instructor or “pre-faculty title”                                                                                                                    | % |
| Hospital title (with or without academic appointment)                                                                                                           | % |
| Other                                                                                                                                                           | % |

Please estimate the percent of your scholars to date who had the following training at the start of the KL2 program

| <b>Estimated Percent of scholars to date with the following training at the start of the KL2 program (SHOULD TOTAL 100%)</b> |   |
|------------------------------------------------------------------------------------------------------------------------------|---|
| <b>CLINICAL</b> training alone (e.g., MD, DVM, DDS, PharmD, etc)                                                             | % |
| <b>RESEARCH</b> training alone (e.g., non-clinical PhDs)                                                                     | % |
| <b>BOTH</b> clinical and research training (e.g., MD/PhD, MD/MS, MD/MPH)                                                     | % |
